1 **An example of too much too soon? A retrospective**  
2 **review of Caesarean Sections performed in the first**  
3 **stage of labour in Kenya**  
4

5 **Authors:** Helen Allott<sup>1</sup>, Fiona Dickinson<sup>1</sup>, Stephen Karangau<sup>2</sup>, Michael Oduor<sup>3</sup>,  
6 Nassir Shaaban<sup>4</sup>, Evans Ogoti<sup>5</sup> Sheila Sawe<sup>5</sup>, Ephraim Ochola<sup>5</sup>, Charles Ameh<sup>1,6</sup>

7

8 <sup>1</sup> Emergency Obstetric Care and Quality of Care Unit, Liverpool School of Tropical Medicine  
9 (LSTM), Liverpool, United Kingdom

10 <sup>2</sup>Muriranjas Subcounty Hospital, Murang'a, Kenya

11 <sup>3</sup>Bondo Subcounty Hospital, Bondo, Kenya

12 <sup>4</sup>Msambweni County Referral Hospital, Msambweni, Kenya

13 <sup>5</sup>Directorate of Reproductive Health, Moi University Teaching and Referral Hospital (MTRH),  
14 Eldoret, Kenya

15 <sup>6</sup>University of Nairobi, Nairobi, Kenya

16

17 Corresponding author: Helen Allott, Liverpool School of tropical Medicine, Pembroke  
18 Place, Liverpool, L35QA. [Helen.allott@lstm.ac.uk](mailto:Helen.allott@lstm.ac.uk)

19 Word count of main text 3480

20 **Synopsis**

21

22 At least 11.5% of Caesarean Sections in the first stage of labour could be avoided if  
23 decision-makers had access to support from more experienced practitioners.

24 **Key words:**

25

26 First-stage of labour, Caesarean section, decision-making

## 27 Abstract

28

### 29 Objective

30 In Kenya, decisions to perform CS are frequently made by unsupported non-  
31 specialist doctors, sometimes resulting in sub-optimal decision-making and  
32 inappropriate surgery. This study assesses decision-making in CS performed in the  
33 first stage of labour by a retrospective case review.

34

### 35 Methods

36

37 A panel of expert obstetricians reviewed case-notes randomly selected from a series  
38 obtained from seven Kenyan referral hospitals, then discussed in pairs and as a  
39 group where opinions differed.

40

### 41 Results

42

43 Of the 87 case-notes reviewed consensus was achieved in 94.3% cases. In 41.3%  
44 cases, CS was considered appropriate by all assessors, including 8.9% cases where  
45 the CS was necessary but performed too late. The decision to delivery interval was 2  
46 hours or longer in 65.8% cases, including 18 cases done for non-reassuring fetal  
47 status. In 10.3% it was considered that further reassessment should have occurred.

48

49 In 9.2% the reviewers concluded that the CS was done too soon and alternative  
50 measures could have been taken. Insufficient information was available in the  
51 records to make a full assessment in 21.8% of cases and in 11.5% the CS was  
52 considered to be inappropriate.

53

## 54 Conclusions

55

56 This review suggests a need for improved support for decision-making, improved  
57 record-keeping and more timely surgery when indicated.

58

## 59 Introduction

60

61 Caesarean Section was reported as an intervention to relieve obstructed labour in  
62 Africa as early as 1879 when Robert Felkin observed the procedure in Uganda  
63 performed on a woman partially anaesthetised with banana wine [1]. On that  
64 occasion both mother and child survived, although mortality from the procedure at  
65 that time was reported to be high. Since then, there have been many improvements  
66 in surgical safety and there is no doubt that appropriate use of CS is life-saving for  
67 both mothers and babies. However, CS is still associated with both short and long-  
68 term consequences, with CS-associated mortality reported in a systematic review as  
69 10.9 per 1000 procedures in sub-Saharan Africa [2]. In the longer term, CS is  
70 associated with significant maternal risks in future pregnancy, including uterine  
71 rupture and abnormal placentation, with attendant risks of catastrophic haemorrhage  
72 [3, 4]. For the neonate, short-term risks of CS include altered immune development,  
73 an increased likelihood of allergy, atopy, and asthma, and reduced intestinal gut  
74 microbiome diversity [5]. Given these risks, it is important that CS usage is restricted  
75 to those cases with appropriate clinical indications.

76

77 Moreover, considering the limited surgical capacity of many health facilities,  
78 especially in low-income countries, conducting non-essential surgery may cause

79 delays for those cases with clear indications. This knock-on effect may contribute to  
80 poor maternal and neonatal outcomes for those waiting in a queue for theatre.

81

82 Despite all the associated risks, there has nevertheless been a rise in rates of CS  
83 across the globe, with an estimated overall rate of 21.1% in 2015, equating to almost  
84 30 million Caesarean births [6]. This rise has fired the debate regarding the  
85 establishment of a recommended rate for birth by CS. A systematic review of  
86 ecological studies determined an association between rising caesarean section rates  
87 and a decrease in both maternal and newborn mortality up to a ceiling varying  
88 between 9% and 16%, after which there were no further improvements in mortality  
89 as rates increased further [7]. A large ecological study including 159 countries,  
90 concluded that CS rates greater than 10% may not be significantly correlated with  
91 changes in maternal and neonatal mortality [8]. In a statement on CS rates in 2015,  
92 the WHO concluded that despite socioeconomic factors explaining a substantial part  
93 of the crude association between CS rate and mortality, nevertheless, at CS rates up  
94 to 10% there was an inverse association between CS rates and maternal and  
95 newborn mortality [9]. An association between stillbirth or morbidity outcomes and  
96 CS rates could not be determined due to the lack of data at the population level. The  
97 WHO has stated that, rather than striving to achieve a recommended CS rate, every  
98 effort should be made to provide caesarean sections to women in need [9].

99

100 In many low-income settings, medical staff who provide care for women giving birth  
101 lack specialist training or support, yet they are required to make complex decisions  
102 regarding surgical interventions. This has the potential to result in the performance of  
103 some unnecessary CSs, and equally a failure to prioritise some cases where CS

104 should have been performed earlier in labour. Moreover, in settings with limited  
105 capacity, the performance of unnecessary CS may lead to extended delays for  
106 indicated CS, with deleterious consequences for women and babies. Solutions to the  
107 joint issues of unnecessary CS and CS performed too late are likely to be  
108 multifactorial. Amongst other strategies, the WHO has recommended that mandatory  
109 second opinions should be sought before performance of CS, and the performance  
110 of facility audit of CS with feedback. In some locations obtaining a second opinion  
111 may not be possible, leaving doctors to make a sometimes-complex management  
112 choice without the opportunity for discussion.

113

114 Expert case review is an established method utilised in undertaking confidential  
115 enquiry into maternal deaths. In such reviews experts make judgements as to  
116 whether clinical management was appropriate or, if not, whether different  
117 management could have resulted in a better outcome [10].

118

119 The aim of this study is to assess decision-making in CS performed in the first stage  
120 of labour in Kenya by a retrospective case review.

121

122

## 123 **Methods**

124

### 125 **Study design**

126

127 A retrospective expert review of randomly selected records of women who gave birth  
128 by CS in the first stage of labour in Kenyan county and sub-county hospitals, was  
129 undertaken.

130

### 131 [Study setting](#)

132

133 Case notes were drawn from hospitals which were part of a United Kingdom Foreign,  
134 Commonwealth & Development Office funded, Maternal and Newborn Health  
135 Programme implemented in five of the 47 counties across Kenya. Seven high  
136 volume facilities were selected from the 25 healthcare facilities included in the  
137 programme. (High volume was defined as conducting more than 130 births per  
138 month). All included healthcare facilities were either county level or sub-county  
139 hospitals, functioning at a Comprehensive Emergency Obstetric and Newborn Care  
140 (CEmOC) level, and all accepted cases referred from other facilities.

141

### 142 [Ethical considerations](#)

143

144 Ethical approval was sought prospectively and obtained from the LSTM Research  
145 Ethics Committee (ref: 21-041) and the Moi University Institutional Research Ethics  
146 Committee (ref: IREC/2021/115). Personal identifiable information concerning staff  
147 and patients was electronically redacted to preserve confidentiality and reduce the  
148 possibility of any reviewer bias.

149

### 150 [Sample size and data collection](#)

151

152 A random selection of case-notes were collected for the period June to November  
153 2020, to avoid the restrictions surrounding the initial onset of the Coronavirus  
154 pandemic and a healthcare providers strike which occurred in December 2020. CS  
155 case-notes were selected using a systematic random sampling technique, using

156 either the Kenya Health Information System, where possible, or the hospital  
157 maternity registers, as a sampling frame.

158

159 From a total of 826 randomly selected CS case-notes retrieved, 507 (61.3%) were  
160 initially designated as eligible for this study, having been carried out in the first stage  
161 of labour. 90 cases were selected randomly from the 507 for detailed analysis, but  
162 three were excluded after it was determined by initial review that the CS had not  
163 been performed in the first stage of labour, leaving a sample size of 87. The choice  
164 of sample size was pragmatic, based upon the time that reviewers were able to  
165 commit to the study. However, for the sample size used, with a 95% confidence  
166 interval, the margin of error would not exceed 9.6%, with a confidence interval within  
167 19.2%.

168 Identification, retrieval and anonymisation of medical records of included cases were  
169 carried out through the Kenya CEMD system [11]. All data collected was managed  
170 on Microsoft Excel Version 16.71 (23031200) and statistics were calculated  
171 manually.

172

173 The reviewers are all experienced obstetricians and none of them work in the  
174 hospitals included in the study. Six reviewers came from Kenya and one from the UK  
175 but with experience of working in LMICs including Kenya.

176

## 177 [Analysis](#)

178

179 Reviewers extracted the following information from each case record; referral status,  
180 parity, history of previous CS, number of fetuses, presentation of the fetus,  
181 birthweight, Apgar scores at 1 and 5 minutes, newborn outcome and complications,

182 maternal outcome and complications, stated reason for the CS, cervical dilation at  
183 decision, position of the presenting part, descent in the maternal abdomen,  
184 contraction frequency and the decision to delivery interval, into a pre-designed  
185 spreadsheet.

186

187 Based upon their review of the available information, reviewers then categorised the  
188 CS according to the following criteria: 1) CS was considered to have been necessary  
189 and appropriate, 2) CS was done too soon and alternative measures could been  
190 tried to progress labour, 3) Prolonged decision to delivery interval and a further  
191 assessment should have been undertaken to ascertain if further progress made, 4)  
192 CS necessary but done too late, 5) Insufficient information available to make a  
193 judgement as to whether CS appropriate and 6) Inappropriate. Categories 1 and 4  
194 were judged as appropriate CS.

195

196 Each case was independently reviewed by two members of the panel and a  
197 conclusion drawn as to the potential appropriateness of the procedure. Where any  
198 discrepancies of opinion were identified between panellists following the initial  
199 review, cases were discussed by the group as a whole and a consensus formed  
200 wherever possible.

201

202 Data concerning maternal and neonatal outcomes and decision to delivery intervals  
203 were analysed as simple descriptive statistics.

204

205



## 206 Results

207

208 Overall, 36 (41.3%) CS were considered appropriate (categories 1 and 4), including  
209 7 (8.9%) (category 4) where it was judged that the decision should have been made  
210 earlier (Table 1).

211

212 In eight (9.2%) cases (category 2), the expert review concluded that a decision to  
213 perform CS had been made too soon, and alternative measures, for example,  
214 augmentation of labour, might have resulted in avoidance of CS. In nine (10.3%)  
215 cases with a prolonged decision to delivery interval (category 3), it was considered  
216 that, had a further assessment been performed prior to the CS, findings may have  
217 changed, rendering the CS potentially unnecessary. In 19 (21.8%) cases (category  
218 5) the quality of the records was such that insufficient information was available for  
219 the experts to reach a conclusion as to the necessity of the CS and in 10 (11.5%)  
220 they concluded that there had been no valid indication for the CS (category 6). In 5  
221 (5.7%) cases the experts were unable to reach a consensus. The common factor in  
222 these cases was the passage of meconium in utero.

223

224 When parity was taken into consideration, 12 (32.4%) of primigravid women had a  
225 CS considered appropriate, compared to 24 (50%) of multiparous women. However,  
226 when women presenting in labour who had two or more previous CS were excluded,  
227 16(33.3%) of multiparous women had appropriate CS.

228

229 31 (35.6%) cases were accepted as referrals from other health facilities and 54  
230 (62.1%) were admitted directly from home. In two cases the source was not

231 determined. There was no difference to the proportion of cases judged appropriate  
 232 whether cases had been referred from other facilities or admitted directly from home.  
 233

234 *Table 1. Classification and characteristics of included cases*

| Category     | Overall n (%) | Referrals | Non-referrals | Referral: status not recorded | Primigravid | Multiparous | Parity not recorded |
|--------------|---------------|-----------|---------------|-------------------------------|-------------|-------------|---------------------|
| 1            | 29(33.3)      | 10(32.2)  | 19(35.2)      |                               | 9(24.3)     | 20(41.7)    |                     |
| 2            | 8(9.2)        | 2(6.4)    | 6(11.1)       |                               | 3(8.1)      | 5(10.4)     |                     |
| 3            | 9(10.3)       | 3(9.7)    | 6(11.1)       |                               | 5(13.5)     | 4(8.3)      |                     |
| 4            | 7(8.9)        | 3(9.7)    | 4(7.4)        |                               | 3(8.1)      | 4(8.3)      |                     |
| 5            | 19(21.8)      | 7(22.6)   | 10(18.5)      | 2(100)                        | 10(27)      | 7(14.6)     | 2(100)              |
| 6            | 10(11.5)      | 5(16.1)   | 5(9.2)        |                               | 4(10.8)     | 6(12.5)     |                     |
| Not agreed   | 5(5.7%)       | 1(3.2)    | 4(7.4)        |                               | 3(8.1)      | 2(4.1)      |                     |
| <b>Total</b> | <b>87</b>     | <b>31</b> |               | <b>2</b>                      | <b>37</b>   | <b>48</b>   | <b>2</b>            |

235  
 236 The decision to delivery interval (DDI) was identified in 79 (90.8%) cases (Figure 1),  
 237 of which in 52 (65.8%) cases this was two hours or longer. Of the 25 cases where  
 238 the primary reason for the CS was given as non-reassuring fetal status, in 5 (20%)  
 239 the DDI was two hours or more, and this was associated with poor outcomes.

240  
 241 *Figure 1. Decision to delivery interval (hours)*

242  
 243 Of the reasons stated in the records for the CS, the most frequent were “non-  
 244 reassuring fetal status” (24 cases, 28%) and “poor progress” (13 cases, 15%). In 33  
 245 of the 36 cases that the assessors considered the CS was definitely indicated, they

246 agreed with the stated reason for the CS. In three cases they felt the CS was  
247 indicated, but not for the reasons stated in the records. This included two cases  
248 where the stated reason was failure to progress in labour and one of non-reassuring  
249 fetal status.

250 The most frequently missing parameters relating to decision-making documented in  
251 the medical records were the frequency and duration of the contractions (75 cases,  
252 86%), the position of the presenting part (72 cases, 83%) and the abdominal descent  
253 of the presenting part (41 cases, 47%). Inconsistent documentation regarding the  
254 fetal heart rate and pattern was a universal finding.

255

256 Using data provided by each of the seven units, the midwifery caseload was  
257 compared to the percentage of births performed by CS (Table 2). The caseload was  
258 calculated by dividing the number of births reported per annum at the time of the  
259 study by the number of full-time equivalent midwives employed. This provides an  
260 indication as to the pressure of work experienced by the midwives.

261

262 *Table 2. Midwifery caseload and CS rate*

| <b>Facility</b> | <b>Total births per day</b> | <b>Midwifery annual case load</b> | <b>CS rate</b> |
|-----------------|-----------------------------|-----------------------------------|----------------|
| 1               | 7.3                         | 97                                | 37%            |
| 2               | 10.7                        | 169                               | 23%            |
| 3               | 4.4                         | 81                                | 41%            |
| 4               | 4.5                         | 151                               | 22.5%          |
| 5               | 13.5                        | 278                               | 26%            |
| 6               | 10.4                        | 234                               | 29%            |
| 7               | 9.9                         | 240                               | 26%            |

263

#### 264 Patient outcomes

265 Eight babies out of the 87 where Apgar Scores were recorded had scores less than  
266 7 at 5 minutes, including two that were freshly stillborn, and there were six  
267 admissions to a newborn care unit. Three mothers experienced a post-partum  
268 haemorrhage and there was one case of bladder injury. It was not possible to assess  
269 whether there were any cases of wound infection from the available data.

270

#### 271 Discussion

272

273 Our results have demonstrated that, in this case series, at least 11.5% of CS were  
274 considered inappropriate by the expert panel. Considering that poor quality of  
275 records precluded the panel coming to a conclusion in 22%, and in a further 20% it  
276 was considered that alternative measures such as augmentation of labour or  
277 reassessment may have led to a different decision, it is possible that as many as half  
278 of the CS performed may have been avoided with different care. Given the risks of  
279 CS to both women and babies, it is important to consider why these potentially  
280 unnecessary surgical births are occurring. The process of making a decision to  
281 operate is complex with many contributory issues relating to capacity, human factors  
282 and both demand and supply-side concerns.

283

284 There was considerable variation in midwifery caseloads between the study facilities  
285 but all were high, indicating that midwives were under considerable pressure when  
286 providing care on the labour ward. For comparison, an annual midwifery caseload of  
287 1 midwife to 28 patients has been reported in UK [11]. The pressure felt by midwives  
288 to get women delivered and off the labour ward may result in midwives referring

289 women to doctors at an earlier stage than they otherwise would, had the staffing  
290 ratio been more favourable. Midwives may fear that they lack the capacity to provide  
291 the extra monitoring necessary when augmenting a labour with oxytocin, for  
292 example. Once a patient has been sent to theatre, midwives may feel better able to  
293 provide care to the women remaining on the labour ward. This may result in  
294 midwives making a case for CS to doctors when other measures could have resulted  
295 in a vaginal birth.

296

297 It has been suggested that doctors may be concerned about the possibility of  
298 litigation if the outcome is sub-optimal [12]. There may be a perception that by  
299 performing a CS they will be seen to have done everything that could be done. This  
300 concern, coupled with inadequate fetal heart rate monitoring, a lack of training about  
301 the significance of changes in the fetal heart rate and pattern and the presence of  
302 meconium in the liquor, may result in over-zealous diagnosis of suspected fetal  
303 hypoxia, commonly termed “non-reassuring fetal status”. We were not able to  
304 conduct key-informant interviews within the scope of this study to confirm these  
305 ideas, but the Kenyan expert assessors were of the view that fear of litigation and  
306 lack of training were both significant factors influencing the decisions of medical  
307 officers.

308

309 The staffing situation is frequently compounded by the redeployment of both  
310 midwifery and medical staff to other departments. Shikuku et [13] determined that, in  
311 the same counties as this study, 42.5% of health service staff who had undertaken  
312 emergency obstetric skills training over a five-year period were redeployed from the

313 maternity unit. This frequently results in less experienced staff being placed on  
314 labour wards with the result of an erosion of decision-making skills.

315

316 The assessors failed to reach agreement concerning cases where the CS was  
317 performed due to the observed passage of fetal meconium in utero. Whereas in  
318 some cases the passage of meconium may occur in relation to gut hypoxia, the  
319 majority babies passing meconium in utero are born with no signs of hypoxia.  
320 Because of the risk of meconium aspiration in utero, if a fetus subsequently develops  
321 hypoxia after passing meconium, guidelines recommend that closer fetal monitoring  
322 should occur in such cases [14]. Some of the assessors felt that CS was justified in  
323 these cases because the labour ward staff lacked the capacity or equipment to  
324 escalate fetal monitoring appropriately. Whilst this may avoid some cases of  
325 meconium aspiration, undoubtedly it tends to increase the number of potentially  
326 avoidable CS. In this case series, the passage of meconium was documented in 28  
327 (32%) of cases. Of these, 24 (85.7%) babies had 5-minute Apgar scores greater  
328 than 7. Of the four cases with meconium liquor and low Apgar scores, two had  
329 prolonged decision to delivery intervals, during which no fetal monitoring was  
330 recorded.

331

332 The WHO has recommended that a second opinion is sought before a decision to  
333 perform a CS is finalised [9], but in this study most decisions were made by non-  
334 specialist doctors without recourse to specialist opinion. In some situations, staffing  
335 constraints and lack of available consultants may have precluded this, but it is also  
336 possible that the prevailing clinical culture is such that doctors feel they may be

337 regarded as incapable if they fail to make decisions on their own, despite a lack of  
338 training in CS decision-making.

339

340 In high income countries there has been much debate regarding the role of women's  
341 choice in CS birth. For example, a study in Australia, found that 77% of obstetricians  
342 would agree to a CS on the grounds of maternal request [15]. In this study however,  
343 maternal request was only documented as a factor in one case. All the facilities  
344 included in this study were public facilities, and the proportion of women requesting  
345 and obtaining CS may be higher in private hospitals [16].

346

347 Prolonged decision to delivery intervals may contribute to both maternal and  
348 neonatal morbidity. In this study only four of the 87 cases were delivered in less than  
349 an hour of the decision for CS. Similar findings were reported in a study from  
350 Uganda based in the national referral hospital, where the median decision to delivery  
351 interval was 5.5 hours [17] and this was often related to the time of day the decision  
352 was made. In our study it was rare to find that the reasons for delay were  
353 documented, although in some cases this was stated to be due to the operating  
354 theatre being occupied by another case. Some facilities had a dedicated maternity  
355 theatre, whilst others shared operating facilities and staff with general surgeons.  
356 Clearly the performance of a non-indicated CS can have a knock-on effect resulting  
357 in delays to other cases, regardless of indication. In this study we found that once a  
358 decision for a CS had been made, in the majority of cases, there was no further  
359 documentation regarding fetal or maternal monitoring. Given that most women  
360 waited for 2 or more hours for their surgery this lack of monitoring is concerning. The  
361 fetal outcome in one of these cases was a fresh stillbirth.

362

### 363 **Strengths and limitations**

364

365 This study utilised the experience and knowledge of the local context of the panel of  
366 expert reviewers. Each case was examined in depth by two reviewers and then  
367 discussed to ensure agreement, which was reached by the panel in all but five  
368 cases. To the best of our knowledge, this is the first such study using this  
369 methodology to review decisions for CS in the first stage of labour in Kenya to be  
370 published.

371

372 Extracted data was limited because of the poor quality of some of the records, and  
373 this constrained the ability of the team to determine the appropriateness of the CS in  
374 21.8% of cases. The sample size in the study was relatively small due to limited  
375 funding and the time constraints of the reviewers taking part. This may limit the  
376 generalisability of the findings

377

### 378 **Conclusions**

379

380 This study has demonstrated that there is room for improvement in CS decision-  
381 making in referral hospitals in Kenya. Whilst CS may seem a straightforward solution  
382 to an immediate concern, education of doctors and midwives should include raising  
383 of awareness regarding both short and long-term consequences, resulting in more  
384 nuanced decision-making. The quality of care provided on the labour ward could be  
385 improved by increases in staff to patient ratios, allowing staff to have adequate time  
386 for fetal and maternal monitoring, both during labour and after a decision for a CS  
387 birth has been made. The need to improve fetal monitoring may also be addressed



388 by technical aids such as hand held doppler devices for intermittent auscultation or  
389 Cardiotocography, but appropriate training should be built into any such  
390 implementation. Interventions to provide in-service education should also include  
391 multi-disciplinary training on the required standards of record-keeping. The creation  
392 of tools such as customised stamps and proformas for recording examination  
393 findings may result in further improvements [17] and facilities should instigate a  
394 regular audit of CS indications to monitor trends in CS.

395

396 Ensuring that CS are performed for appropriate indications requires multiple  
397 interventions and investment. Developing a context-specific understanding as to the  
398 causes of inappropriate surgery is key to targeting such interventions. Further  
399 studies are indicated to understand whether these findings are representative of the  
400 wider situation in Kenya and beyond.

401

## 402 **Acknowledgements**

403

404 The authors gratefully acknowledge Lucy Nyaga and the members of the LSTM  
405 Kenya and UK teams for their support with this study, and Dr Paul Nyongesa for  
406 assistance with obtaining ethical approval from Moi University Institutional Research  
407 Ethics Committee.

408

## 409 **Funding**

410

411 The study was partly funded under a grant from the UK FCDO (Reducing Maternal &  
412 Neonatal Death in Kenya, number 202549) (Charles Ameh), and partly from an

413 award from LSTM (Fiona Dickinson). The funders had no role in study design, data  
414 collection and analysis, decision to publish, or preparation of the manuscript.

415

416

## 417 Author contributions

418

419 Helen Allott: Conceptualisation, methodology, investigation, formal analysis, writing-  
420 original draft preparation & editing

421 Fiona Dickinson: Conceptualisation, funding acquisition, methodology, investigation,  
422 formal analysis, writing-review and editing

423 Stephen Karangau: Data interpretation, formal analysis, writing-review & editing

424 Michael Odour: Data interpretation, formal analysis, writing-review & editing

425 Nassir Shaban: Data interpretation, formal analysis, writing-review & editing

426 Evans Ogoti: Data interpretation, formal analysis, writing-review & editing

427 Sheila Sawe: Data interpretation, formal analysis, writing-review & editing

428 Ephraim Ochola: Data interpretation, formal analysis, writing-review & editing

429 Charles Ameh: Conceptualisation, funding acquisition, methodology, supervision,  
430 writing-review & editing

## 431 Conflict of Interests

432 The authors have no conflict of interests

433

434

## 435 References

436

- 437 1. Felkin RW, Notes on labour in Central Africa. *Trans Edinb Obstet Soc.* 1884;  
438 9: 28–39
- 439 2. Sobhy S, Arroyo-Manzano D, Murugesu N, Karthikeyan G, Kumar V, Kaur I,  
440 Fernandez E, Gundabattula SR, Betran AP, Khan K, Zamora J. (2019)  
441 Maternal and perinatal mortality and complications associated with caesarean  
442 section in low-income and middle-income countries: a systematic review and  
443 meta-analysis. *The Lancet.* 2019 May 11;393(10184):1973-82
- 444 3. Motomura, K., Ganchimeg, T., Nagata, C. et al. Incidence and outcomes of  
445 uterine rupture among women with prior caesarean section: WHO  
446 Multicountry Survey on Maternal and Newborn Health. *Sci Rep* 7, 44093  
447 (2017). doi: 10.1038/srep44093
- 448 4. Chen S, Cheng W, Chen Y, Liu X. The risk of abnormal placentation and  
449 hemorrhage in subsequent pregnancy following primary elective cesarean  
450 delivery. *J Matern Fetal Neonatal Med.* 2020 Nov;33(21):3608-3613. doi:  
451 10.1080/14767058.2019.1581167
- 452 5. Sandall J, Tribe RM, Avery L, Mola G, Visser G, Homer C, Gibbons D, Kelly N,  
453 Kennedy H, Kidanto H, Taylor P and Tennerman M. Short and long term  
454 effects of Caesarean section on the health of women and children. *The*  
455 *Lancet.* 2018, October 13, 392: 1349-1357
- 456 6. Boerma T, Ronsmans C, Melesse DY, Barros AJD, Barros FC, Moller A-B,  
457 Saye L, Hosseinpoor AR, Yi M, Neto D and Temmerman M. Global  
458 epidemiology of use of and disparities in Caesarean Section. *The Lancet*  
459 2018, October 13, 392: 1341-1348

- 460 7. Betran, A.P., Torloni, M.R., Zhang, J. *et al.* What is the optimal rate of  
461 caesarean section at population level? A systematic review of ecologic  
462 studies. *Reprod Health* **12**, 57 (2015). [https://doi.org/10.1186/s12978-015-0043-](https://doi.org/10.1186/s12978-015-0043-6)  
463 6
- 464 8. Ye, J, Zhang, J, Mikolajczyk, R, Torloni, MR, Gülmezoglu, AM, Betran, AP.  
465 Association between rates of caesarean section and maternal and neonatal  
466 mortality in the 21st century: a worldwide population-based ecological study  
467 with longitudinal data. *BJOG* 2016; 123: 745– 753.
- 468 9. World Health Organisation. WHO statement on Caesarean section rates  
469 2015. <https://www.who.int/publications/i/item/WHO-RHR-15.02>
- 470 10. Knight M, Bunch K, Patel R, Shakespeare J, Kotnis R, Kenyon S, Kurinczuk  
471 JJ (Eds.) on behalf of MBRRACE-UK. Saving Lives, Improving Mothers' Care  
472 Core Report - Lessons learned to inform maternity care from the UK and  
473 Ireland Confidential Enquiries into Maternal Deaths and Morbidity 2018-20.  
474 Oxford: National Perinatal Epidemiology Unit, University of Oxford 2022
- 475 11. Helen Smith, Charles Ameh, Pamela Godia, Judith Maua, Kigen Bartilol,  
476 Patrick Amoth, Mathews Mathai, Nynke van den Broek. Implementing  
477 Maternal Death Surveillance and Response in Kenya: Incremental Progress  
478 and Lessons Learned. *Global Health: Science and Practice* Sep  
479 2017, 5 (3) 345-354; doi: 10.9745/GHSP-D-17-00130
- 480 12. Sunita Panda, Cecily Begley, Deirdre Daly. Clinicians' views of factors  
481 influencing decision-making for caesarean section: A systematic review and  
482 metasynthesis of qualitative, quantitative and mixed methods studies. *PLOS*  
483 *ONE*, 2018; 13 (7): e0200941 doi: [10.1371/journal.pone.0200941](https://doi.org/10.1371/journal.pone.0200941)

- 484 13. Shikuku DN, Nyaoke I, Maina O, Eyinda M, Gichuru S, Nyaga L, Iman  
485 F, Tallam E, Wako I, Bashir I, Allott H, Ameh C. The determinants of staff  
486 retention after Emergency Obstetrics and Newborn Care training in Kenya: a  
487 cross-sectional study. *BMC Health Serv Res* 22, 872 (2022).  
488 <https://doi.org/10.1186/s12913-022-08253-2>
- 489 14. Ministry of Public Health and sanitation and ministry of medical services,  
490 Kenya. National guidelines for Quality Obstetrics and Perinatal Care. 2022.  
491 Accessed online on 2<sup>nd</sup> March 2023 from {[https://www.diva-](https://www.diva-portal.org/smash/get/diva2:1401873/FULLTEXT01.pdf)  
492 [portal.org/smash/get/diva2:1401873/FULLTEXT01.pdf](https://www.diva-portal.org/smash/get/diva2:1401873/FULLTEXT01.pdf)}
- 493 15. Robson SJ, Tan WS, Adeyemi A, Dear KBG. Estimating the rate of cesarean  
494 section by maternal request: anonymous survey of obstetricians in Australia.  
495 *Birth*. 2009;36(3):208–12. <https://doi.org/10.1111/j.1523-536X.2009.00331.x>.
- 496 16. Litorp H, Mgaya A, Mbekenga CK, Kidanto HL, Johnsdotter S, Essen B. Fear,  
497 blame and transparency: obstetric caregivers' rationales for high caesarean  
498 section rates in a low-resource setting. *Social Science and Medicine*  
499 2015b;143:232–40
- 500 17. Hughes, N.J., Namagembe, I., Nakimuli, A. *et al*. Decision-to-delivery interval  
501 of emergency cesarean section in Uganda: a retrospective cohort study. *BMC*  
502 *Pregnancy Childbirth* 20, 324 (2020). [https://doi.org/10.1186/s12884-020-](https://doi.org/10.1186/s12884-020-03010-x)  
503 [03010-x](https://doi.org/10.1186/s12884-020-03010-x)
- 504 18. Kumar P, Sammut SM, Madan JJ, *et al*. Digital ≠ paperless: novel interfaces  
505 needed to address global health challenges. *BMJ Global Health*  
506 2021;6:e005780

507  
508 Figure 1: Decision to delivery interval (hours)
